# Supplementary material
Source: MDPI journal article supplement (https://www.mdpi.com/2673-4583/5/1/81)
Supplement: s1 [file s1]

# Determination of Chemical Oxygen Demand (COD) Using Nanoparticle-Modified Voltammetric Sensors and Electronic Tongue Principles

## Abstract

This research focuses on the use of nanoparticle-modified voltammetric sensors for the rapid and green determination of Chemical Oxygen Demand in river waters and waters from agricultural waste. Four different variants of modified electrodes have been prepared: CuO nanoparticles electrogenerated over Cu and covered with Nafion film (CuO/Cu-Nf), and graphite-epoxy composites modified with Cu, CuO, and Cu-Ni alloy nanoparticles. The response features of these electrodes were assessed by calibrating them vs. glucose, glycine, ethylene glycol, and potassium hydrogen phthalate in alkaline media, as samples providing different difficulty in their (bio)degradation characteristics. The most sensitive electrode was demonstrated to be the (CuO/Cu-Nf) electrode, with an LOD of  $12.3 \text{ mg O}_2 \cdot \text{L}^{-1}$ . The joint information provided by the sensor array showed the ability of estimating both the organic load and the type of sample in terms of difficulty of degradation, in what can be named an intelligent sensor assembly.

## Chemical Oxygen Demand (COD)

Chemical Oxygen Demand (COD) is defined as the amount of molecular oxygen (in milligrams of  $\text{O}_2$ ) required to decompose all the organic compounds in 1 L of aqueous solution to carbon dioxide and water. There are many methods reported for COD determination, such as the conventional dichromate titration method. Electro-oxidizing the organic contaminants to completely transform them into  $\text{CO}_2$  and  $\text{H}_2\text{O}$  using sensors is considered the best method for COD estimation [1-3].

## Fabrication of Electrodes

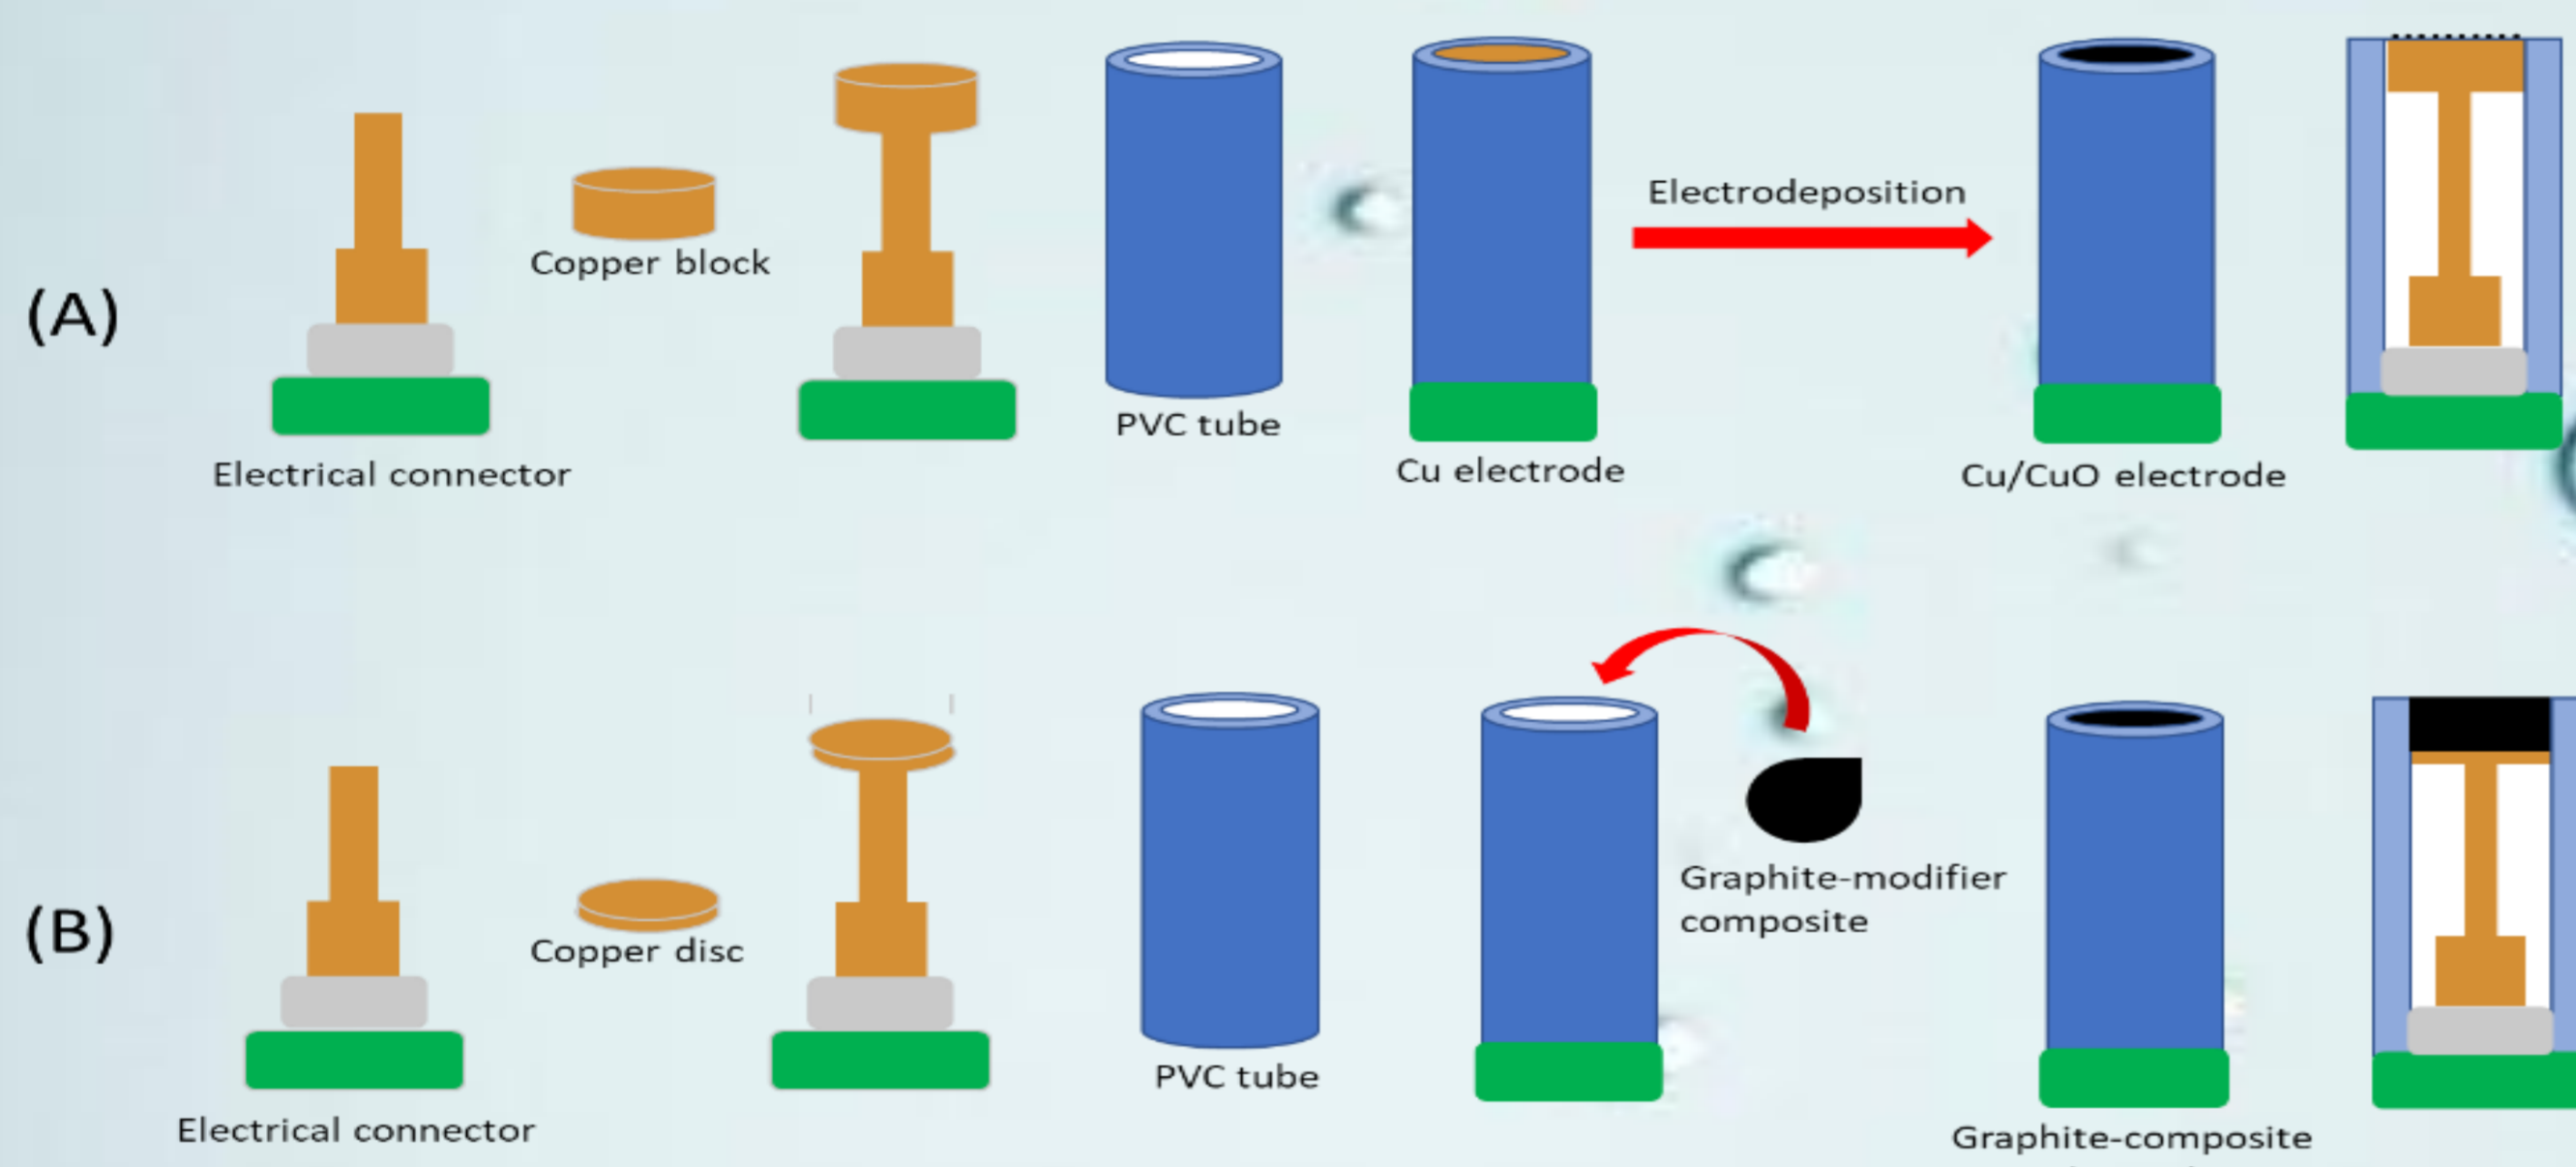

Figure 1. Diagram of the fabrication procedures of (A) the deposited Cu/CuO electrode and (B) the graphite-epoxy electrodes (E2, E3 and E4) modified with metal nanoparticles (Cu, CuO and Ni Cu alloy, respectively)

## Response Tests on Standard Compounds

### 1. Voltammetric Responses of Electrodes to Standard Compounds

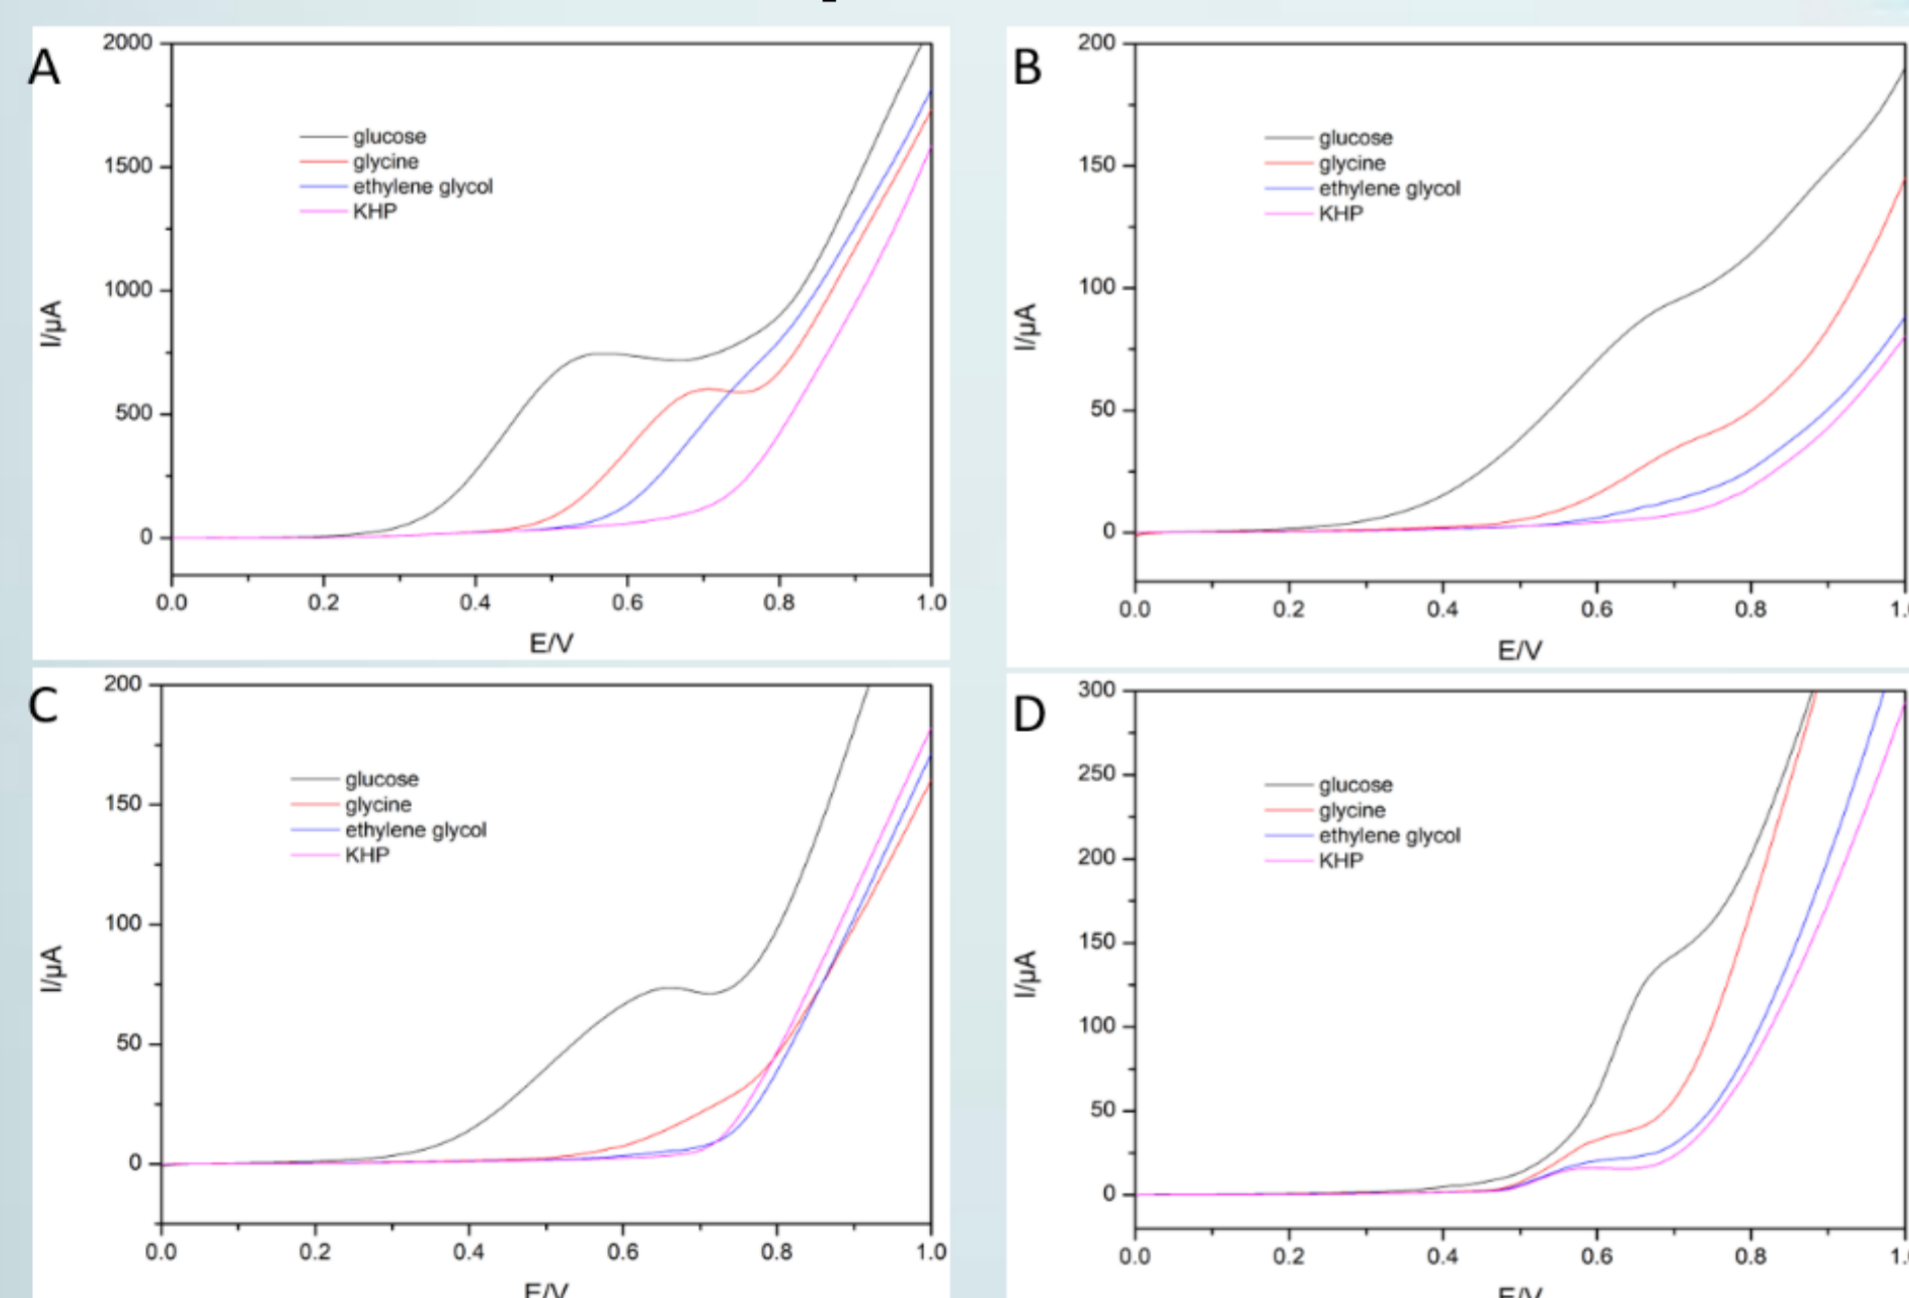

Figure 2. Oxidation curves of cyclic voltammetric responses of electrodes E1 (A), E2 (B), E3 (C), and E4 (D) to four standard chemical oxygen demand (COD) substances: 2.15 mM glucose; 2.15 mM glycine; 2.15 mM ethylene glycol; 2.15 mM KHP.

### 2. PCA on Standard Compounds

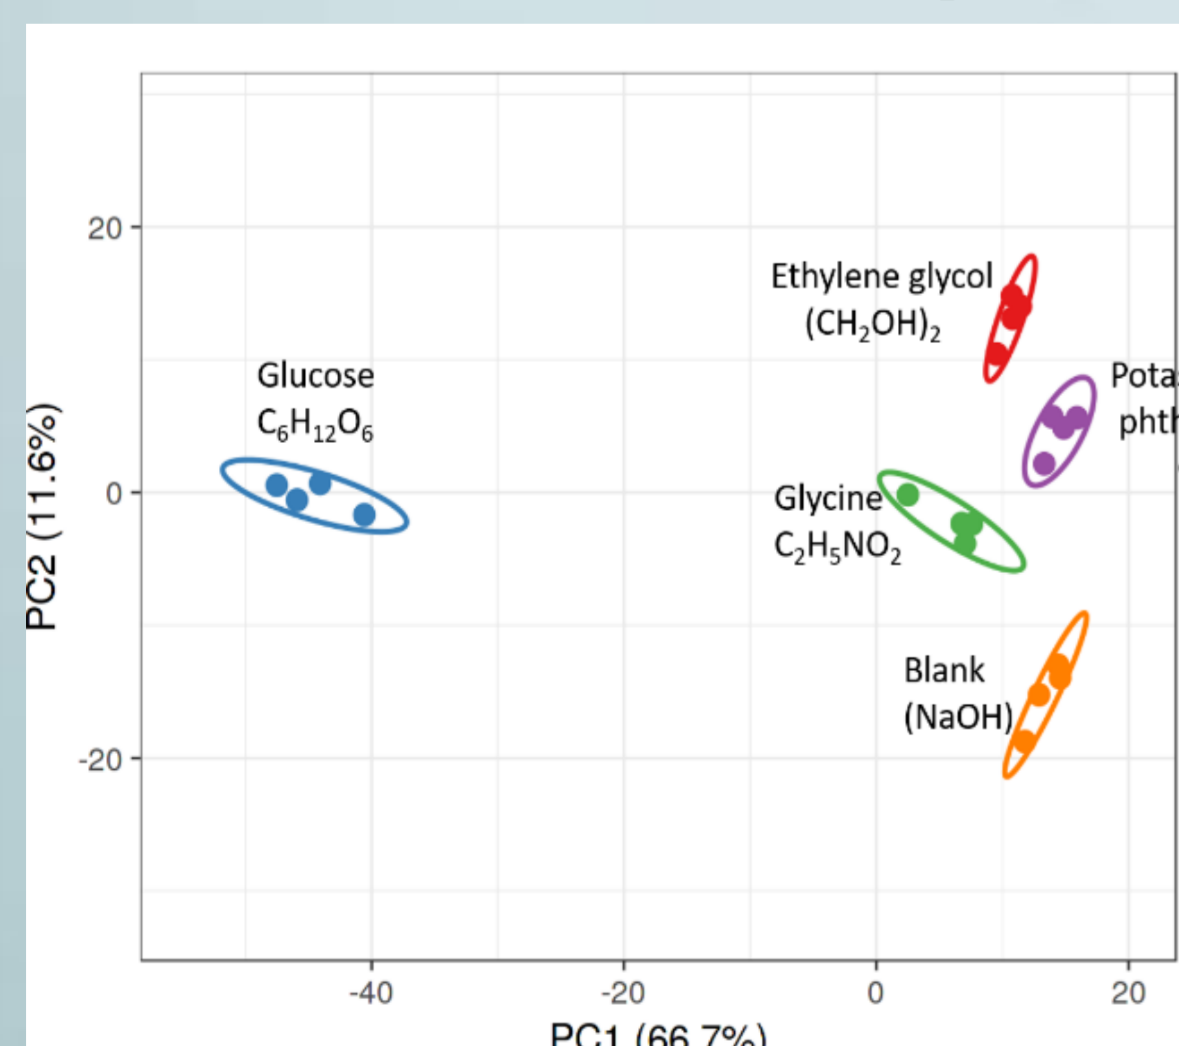

Figure 3. Score plot of the first two components obtained after principal component analysis (PCA). A total of 20 samples were analyzed corresponding to quadruplicate determinations of glucose (blue), glycine (green), ethylene glycol (red), potassium hydrogen phthalate (purple), and blank (orange).

## Acknowledgements

Financial support for this work was provided by Spanish Ministry of Science and Innovation through the project CTQ 2016-80170 and by program ICREA Academia from Generalitat de Catalunya. Qing Wang thanks the support of Universitat Autònoma de Barcelona and China Scholarship Council for the UAB-CSC joint scholarship.

## Real Samples Analysis

### 1. Calibration

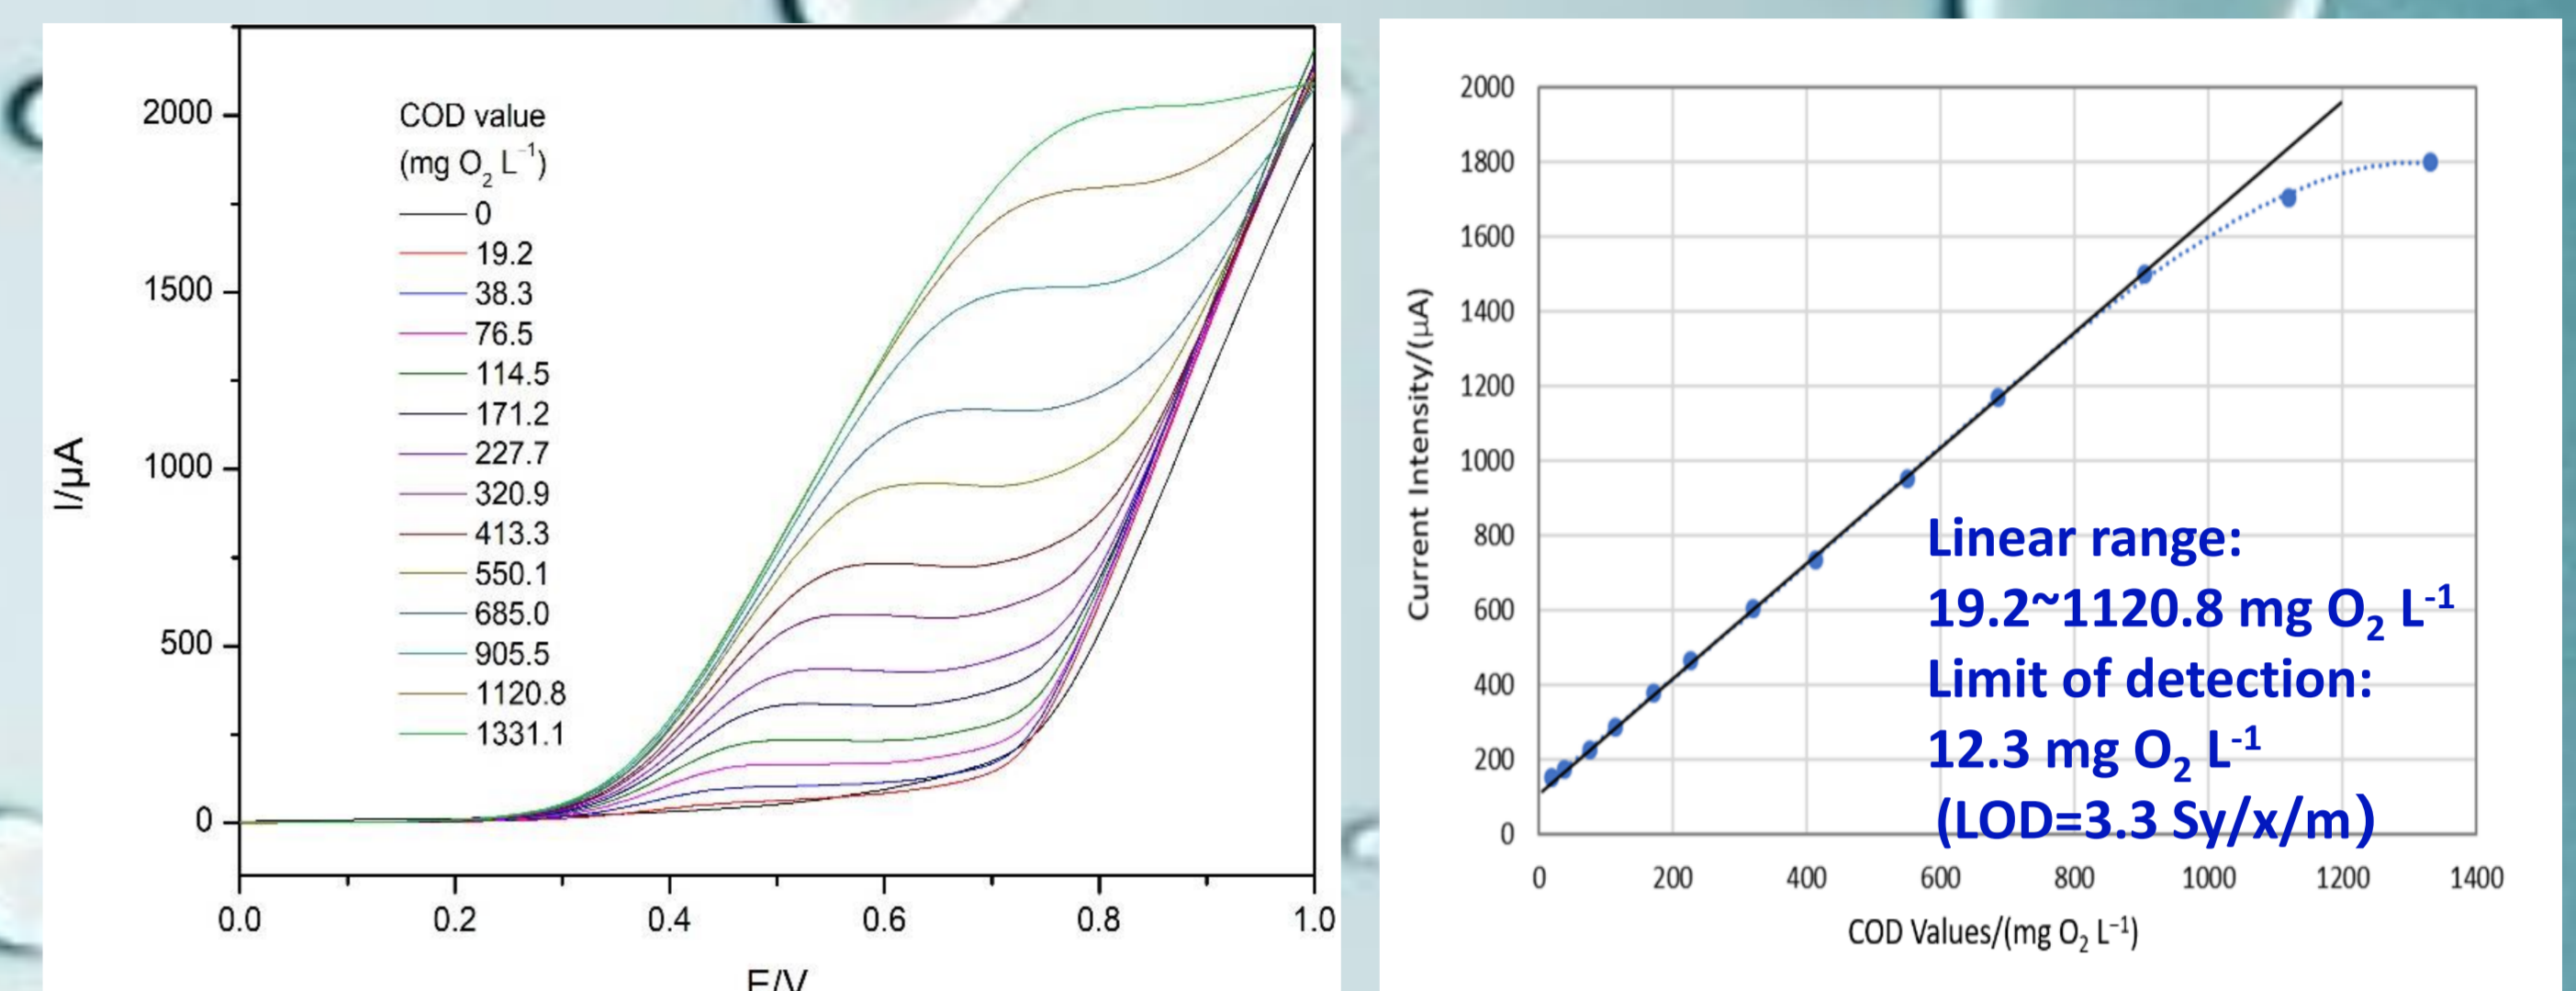

Figure 4. (A) Oxidation curves of cyclic voltammetric responses of electrode E1 with the increase of addition of glucose in 0.05 M NaOH solution. (B) Calibration plot of intensity of current at  $E=0.7050$  of electrode E1 as a function of COD values (glucose as standard substance). Potential scan window,  $-1.0$  to  $+0.7$  V vs. Ag/AgCl (3.0 M KCl). Scan rate, 50 mV/s.

### 2. Spiking Tests

Table 1. Recovery yield of spiked glucose detected by electrode E1 towards Sample 1, 2 and 3.

|                        | Sample found ( $\text{mg O}_2 \text{ L}^{-1}$ ) | Added glucose ( $\text{mg O}_2 \text{ L}^{-1}$ ) | Spiked sample found | Recovery yield (%) |
|------------------------|-------------------------------------------------|--------------------------------------------------|---------------------|--------------------|
| Sample 1               | <LOD                                            | 38.32                                            | 27.11               | 109.5              |
| Sample 2               | <LOD                                            | 38.32                                            | 27.67               | 108.6              |
| Sample 1 <sup>nd</sup> | 33.76                                           | 95.52                                            | 112.11              | 82.02              |
| Sample 2 <sup>nd</sup> | 17.10                                           | 95.52                                            | 101.64              | 88.51              |
| Sample 3 <sup>nd</sup> | 18.56                                           | 95.52                                            | 97.37               | 82.50              |

<sup>nd</sup> Spiking tests of real samples with fewer dilution.

### 3. PCA on Real Samples and Standard Compounds

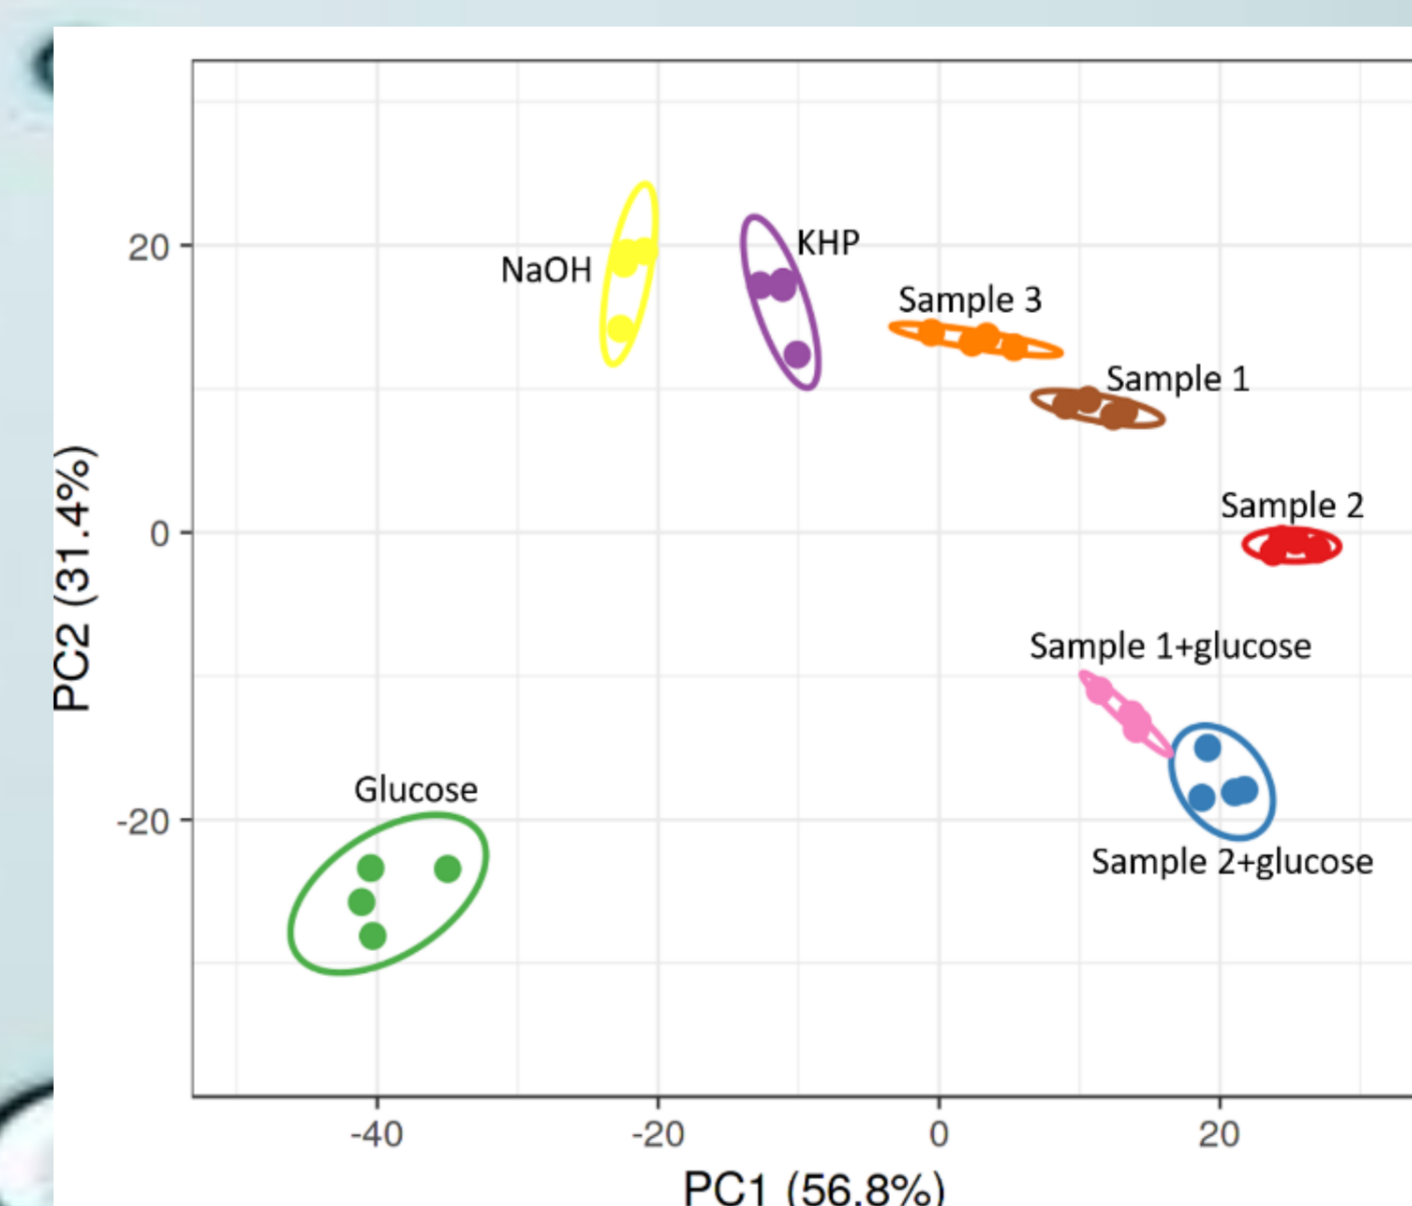

Figure 5. Score plot of the first two components obtained after PCA analysis to real samples and standard substances. These samples are glucose (green), NaOH (yellow), potassium hydrogen phthalate (purple), Sample 1 (brown) and its spike with glucose (pink), Sample 2 (red) and its spike with glucose (blue), and Sample 3

Sample 2, which contains lots of pesticides, is on the right. Sample 1 contains fewer pesticides than Sample 2, more left. Sample 3 also contains some organic compounds that are difficult to be degraded.

## Conclusion

This work developed an easy method of analyzing wastewaters quantitatively and qualitatively by combining the electrochemical electrodes with the electronic tongue technique. The COD values were calculated based on the calibration and the PCA technique can be used to evaluate the main component of a river sample, which is easy or difficult to be degraded. The resulting sensor-based method demonstrates great potential not only for estimating the precise value of organic load but for predicting the difficulty behavior in its degradation.

## References

- [1] C. R. Silva, C. D. C. Conceição et al., *J Solid State Electrochem*, 2009 (13), 665-660;
- [2] T. Carchi, B. Lapo and L. Fernández et al., *Sensors*, 2019 (19), 669-685.
- [3] M. Gutiérrez-Capitán, A. Baldi et al., *Anal. Chem.* 2015, 87, 2152-2160
